# Supplementary material for: Producing Vaccines against Enveloped Viruses in Plants: Making the Impossible, Difficult
Source: MDPI journal article supplement (doi:10.3390/vaccines9070780), 2021-07-13

## Supplementary Information

### Producing vaccines against enveloped viruses in plants: making the impossible, difficult.

Hadrien Peyret, John F.C. Steele\*, Jae-Wan Jung, Eva C. Thuenemann, Yulia Meshcheriakova, George P. Lomonossoff

Department of Biochemistry and Metabolism, John Innes Centre, Norwich, UK

\* Current address: Piramal Healthcare UK Ltd., Piramal Pharma Solutions, Earls Road, Grangemouth, Stirlingshire, Scotland, UK, FK3 8XG.

Figure 2 complete western blots

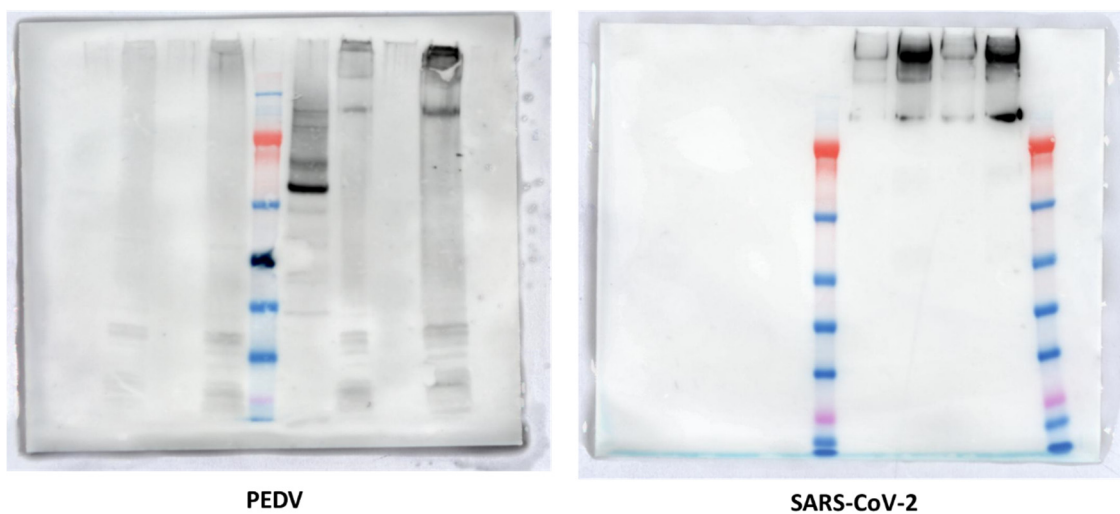

Figure 3 complete western blots

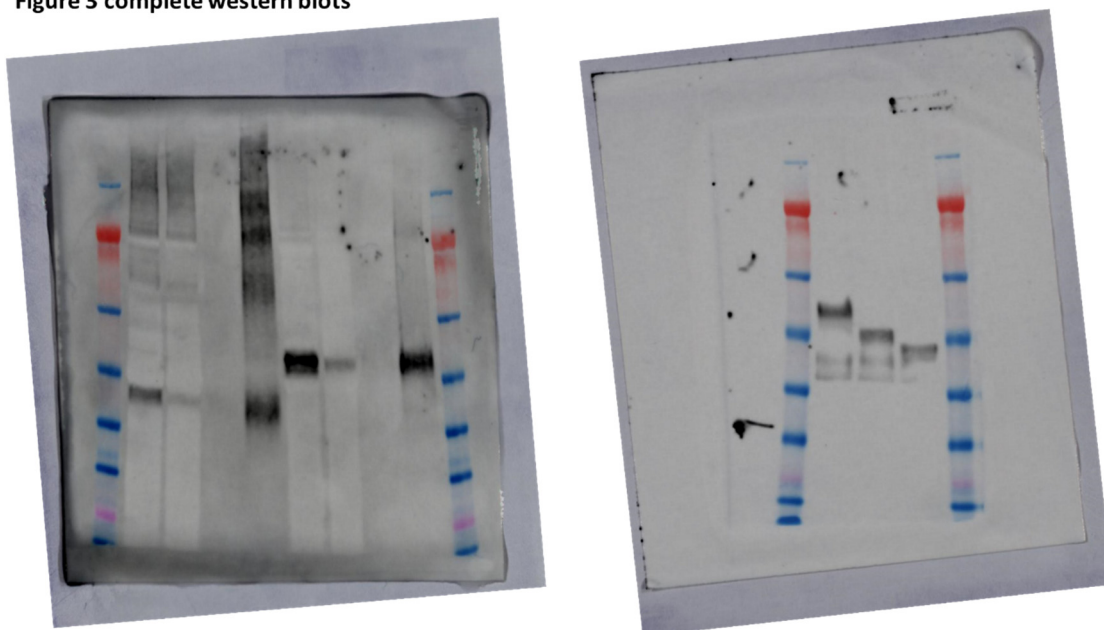

**Figure 4 complete western blot**

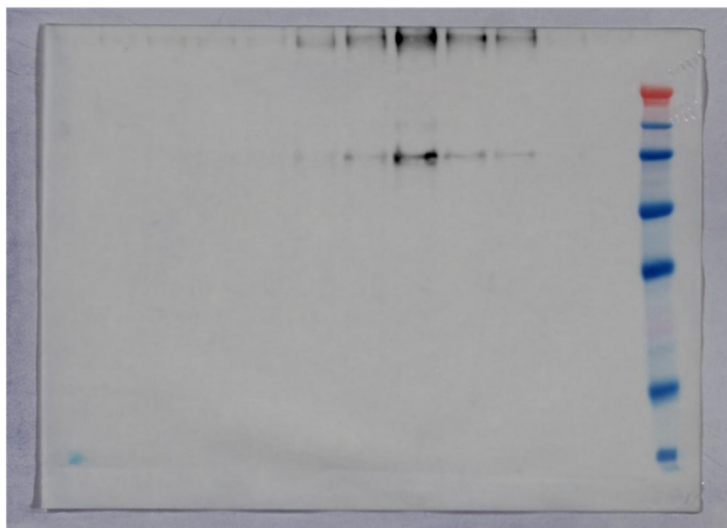

**Figure 5D complete western blot**

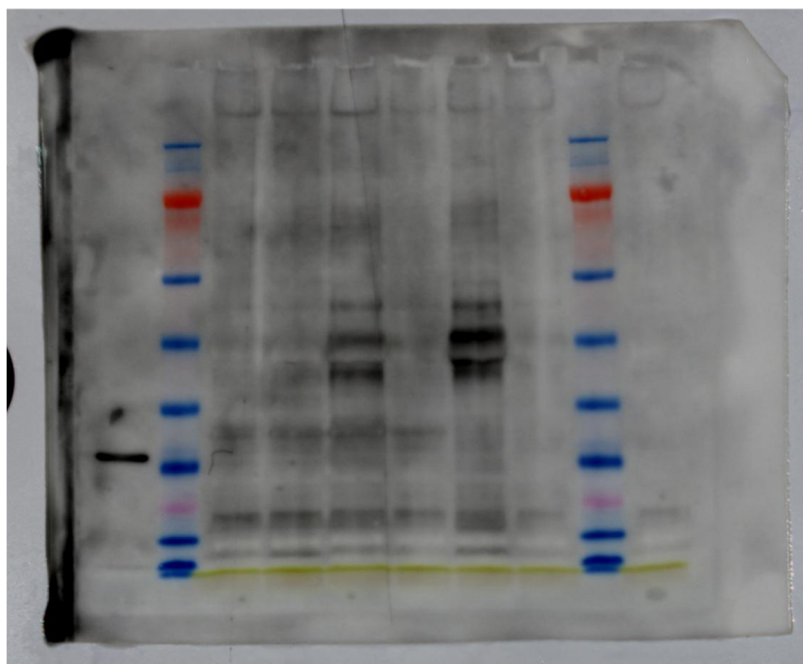

Supplement: s1 [file s1]
